# Supplementary material for: In vitro biosynthesis of bacterial peptidoglycan using d-Cys-containing precursors: fluorescent detection of transglycosylation and transpeptidation
Source: Royal Society of Chemistry journal article supplement (doi:10.1039/b819869a), 2009-01-01
Supplement: b819869a.pdf [file b819869a.pdf]

Supporting Information for Vinatier *et al.* "In vitro biosynthesis of bacterial peptidoglycan using D-Cys-containing precursors: fluorescent detection of transglycosylation and transpeptidation"

Fluorescent peak 1 – GlcNAc-MurNAc-pentapeptide(D-Cys)-fluorescein

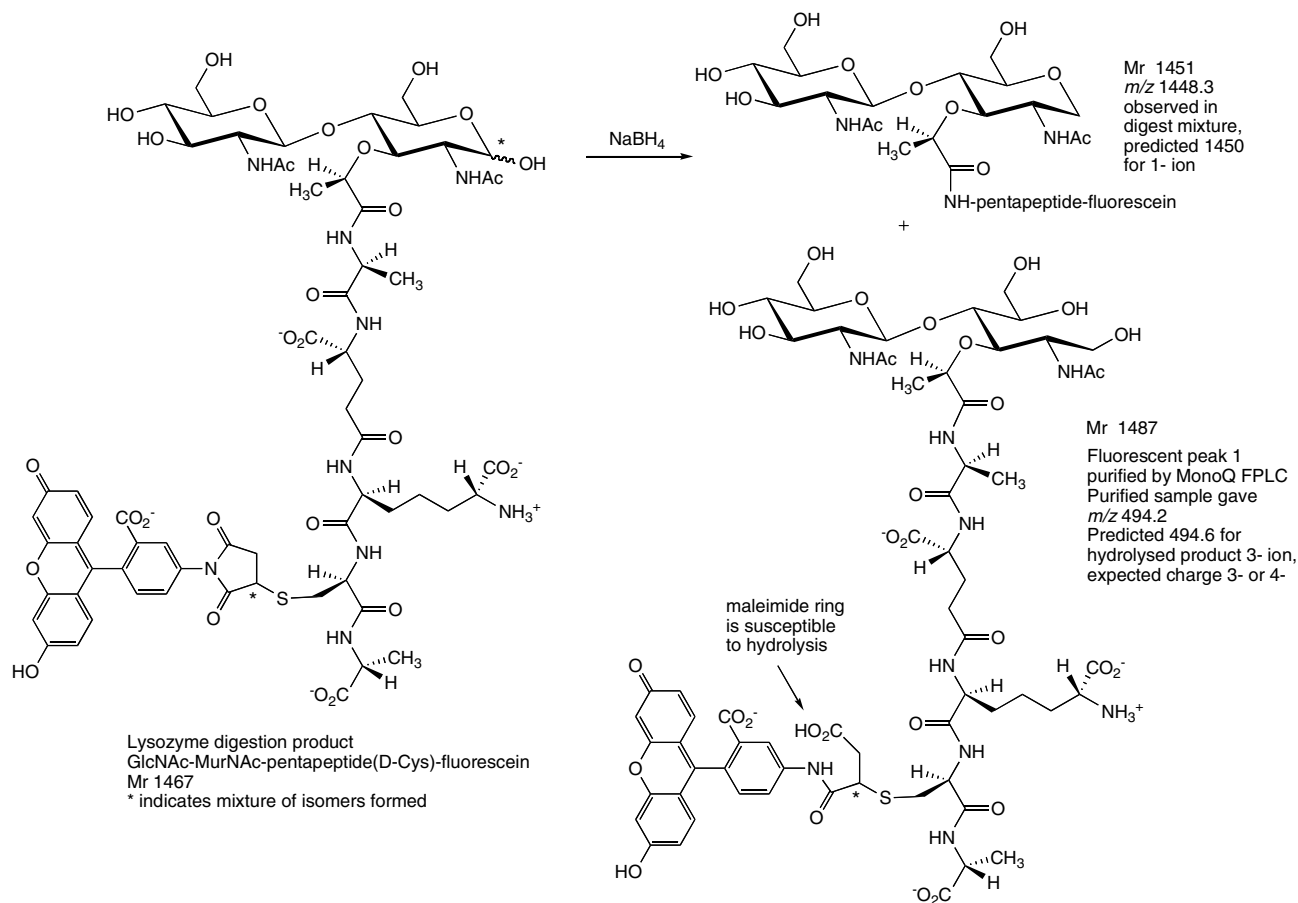

ES-MS (-ve ion) of lysozyme digest after NaBH<sub>4</sub> treatment

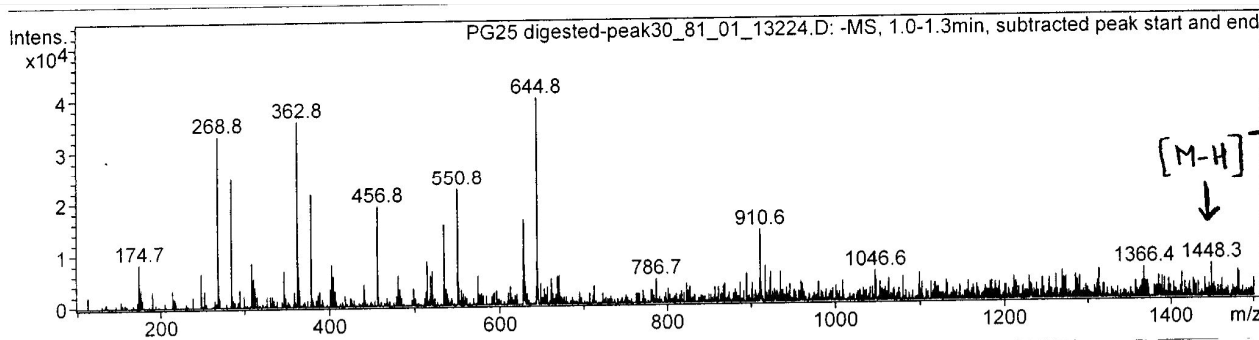

ES-MS (-ve ion) of FPLC purified peak

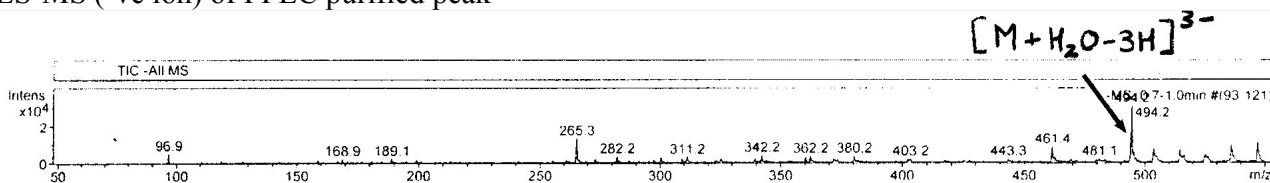

## Fluorescent peak 2 – GlcNAc-MurNAc-pentapeptide dimer-fluorescein

Lysozyme digestion product  
GlcNAc-MurNAc-pentapeptide dimer-fluorescein  
Mr 2389  
\* indicates mixture of isomers formed

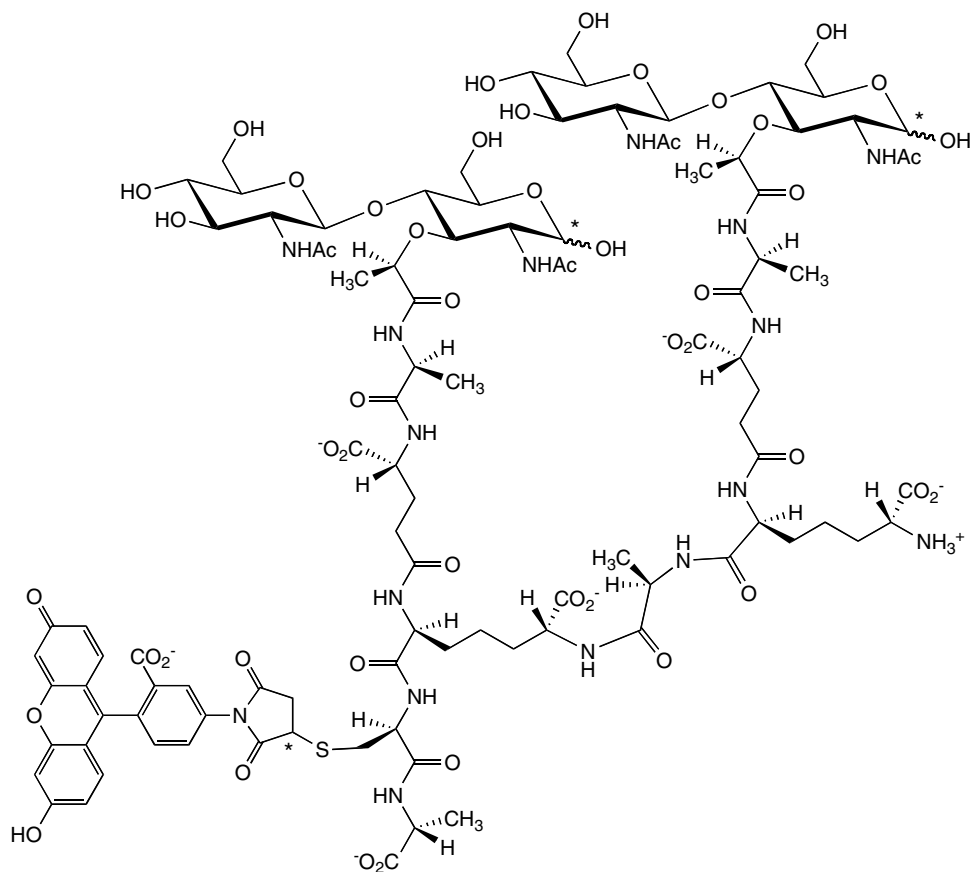

Fluorescent peak 2  
(prior to NaBH<sub>4</sub> treatment)  
after MonoQ FPLC purification  
gave *m/z* 397.2  
Predicted *m/z* 397.2 for 6- ion  
Expected charge 5- or 6-

## ES-MS (-ve ion) of FPLC purified peak 2

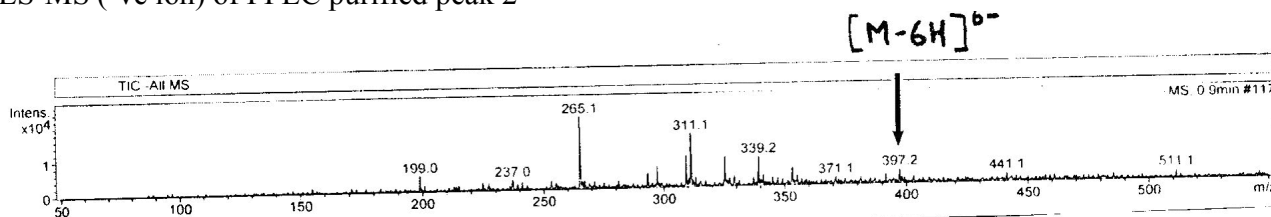

Digestion of D-Cys-labelled peptidoglycan with MurNAc-L-Ala amidase, followed by labelling with fluorescein iodoacetamide, and purification of fluorescently labelled products by MonoQ FPLC, gave signals corresponding to the pentapeptide product, labelled with two IAF fluorophores:

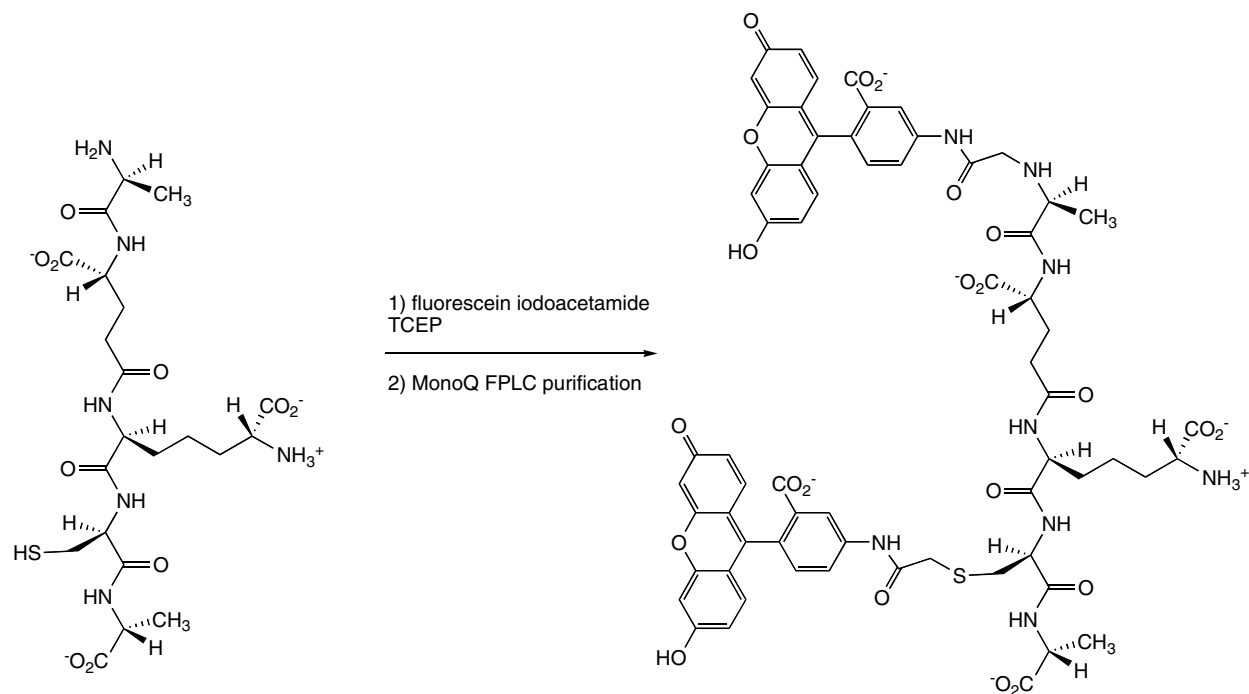

MurNAc-L-Ala amidase digestion product

Mr 1340.7  
FPLC purified sample gave  $m/z$  446.0  
Predicted 445.9 for 3- ion,  
expected charge 3- or 4-.

ES-MS (-ve ion) of FPLC-purified amidase digest

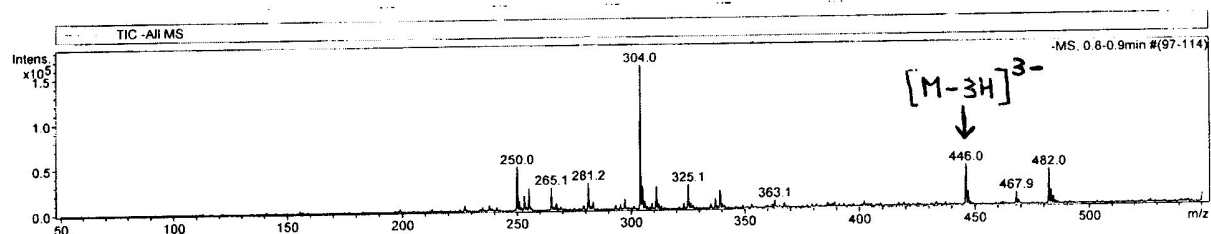

### *Surface plasmon resonance protocol*

SPR measurements were performed using a custom built SPR instrument based on a Kretschmann configuration, using a 5mW HeNe laser ( $\lambda = 632.8$  nm). SPR spectra were simulated using a four layer model representing prism, gold, organic layer, and subphase with refractive indices of  $n$  1.84, 0.25-3.1, 1.45, and 1.33 respectively. Spectra were taken over a  $16^\circ$  range to include the critical angle and the minima for accurate modelling. All kinetic data were taken one degree, external angle, below the initially observed minima to give a maximum change in signal. SPR measurements were undertaken on Schott TiH53 high refractive index right angle prisms (Galvoptics, Essex, U.K.) with a 48 nm gold layer on the hypotenuse. The gold layer was deposited by electrothermal evaporation (rate 0.1-0.2 nm s<sup>-1</sup>, pressure  $8 \times 10^{-7}$  mbar) directly onto the prisms. A 1 mM solution of self assembled monolayer forming thiols was obtained by mixing the respective EO3-cholesterol component (L.M. Williams et al., *Langmuir* **1997**, *13*, 751-757) and the mercaptoethanol component to the desired ratio in propan-2-ol. EO3-cholesterol was used at 3 mol% in solution, which approximates a surface area of 30%. The gold coated prisms were incubated in the mixed thiol solution for 1 h, after which they were rinsed in MilliQ deionized water and propanol and then stored under nitrogen until required.

The mixed SAM activated prism was incubated with the relevant vesicle solution and the kinetics of adsorption followed in real time, by monitoring the change in reflectivity at a fixed angle below the resonance minimum. Upon reaching steady state conditions, the flow cell, which had a volume of 100  $\mu$ L, was flushed with 8 times its volume to remove all vesicles from the solution as well as any nonspecifically surface bound vesicles. Peptidoglycan precursors were then injected into the flow cell and the kinetics of binding and polymerisation followed. Once the kinetic data collection was completed, a reflectivity curve was taken and compared to the initial curve, thus giving a quantification of adsorbed layer thickness by modelling of the curves and the respective shift in the resonance minima.
